# Supplementary material for: A fluorescein labeled aptamer switch for thrombin with fluorescence decrease response
Source: Royal Society of Chemistry journal article supplement (doi:10.1039/c5ay00464k), 2015-01-01
Supplement: c5ay00464k1.pdf [file c5ay00464k1.pdf]

## **Electronic Supplementary Information**

### **A Fluorescein Labeled Aptamer Switch for Thrombin with Fluorescence Decrease Response**

Lihua Hao<sup>1</sup>, Qiang Zhao<sup>1,2\*</sup>

<sup>1</sup>Institute of Environmental Science, College of Chemistry and Chemical Engineering, Shanxi University, Taiyuan, P. R. China, 030006

<sup>2</sup>State Key Laboratory of Environmental Chemistry and Ecotoxicology, Research Center for Eco-Environmental Sciences, Chinese Academy of Sciences, Beijing, 100085, P. R. China

**Table S1 List of tested DNA oligonucleotides and labeling Sites**

| Name       | Sequences                                          |
|------------|----------------------------------------------------|
| Th27       | 5'-GTC CGT GGT AGG GCA GGT TGG GGT GAC-3'          |
| Th29       | 5'-A GTC CGT GGT AGG GCA GGT TGG GGT GAC T-3'      |
| Th27-3-FAM | 5'-GTC CGT GGT AGG GCA GGT TGG GGT GAC-3'(FAM)     |
| Th27-5-FAM | 5'(FAM)-GTC CGT GGT AGG GCA GGT TGG GGT GAC-3'     |
| Th27-3-TMR | 5'-GTC CGT GGT AGG GCA GGT TGG GGT GAC-3'(TMR)     |
| Th27-3-Cy3 | 5'-GTC CGT GGT AGG GCA GGT TGG GGT GAC-3'(Cy3)     |
| Th29-3-FAM | 5'-A GTC CGT GGT AGG GCA GGT TGG GGT GAC T-3'(FAM) |

**Table S2 Comparison of various aptamer-based fluorescence assays for thrombin with respect to methods, limit of detection (LOD) and linear dynamic range (LDR)**

| Methods                                                   | LOD      | LDR             | Ref.      |
|-----------------------------------------------------------|----------|-----------------|-----------|
| Molecular beacon with signal-decrease response            | 0.373 nM | NA <sup>a</sup> | 10        |
| Molecular beacon with signal-increase response            | 10 nM    | 10-40 nM        | 11        |
| Assay using guanine as quencher in aptamer                | 0.34 nM  | NA              | 13        |
| Assay using dual pyrene labeled aptamer                   | 0.042 nM | 0.042-17 nM     | 14        |
| Fluorescence polarization assay                           | 0.20 nM  | 0.6-100 nM      | 15        |
| Assay using aptamer and ethidium bromide                  | 2.8 nM   | 2.8-20 nM       | 16        |
| Time resolved fluorescence assay                          | 0.14 nM  | 1-10 nM         | 17        |
| Assay using aptamer with fluorescent nucleotide analogues | 9.7 nM   | NA              | 18        |
| Assay using FAM labeled aptamer                           | 0.062 nM | 0.062-2 nM      | This work |

a: NA means not available

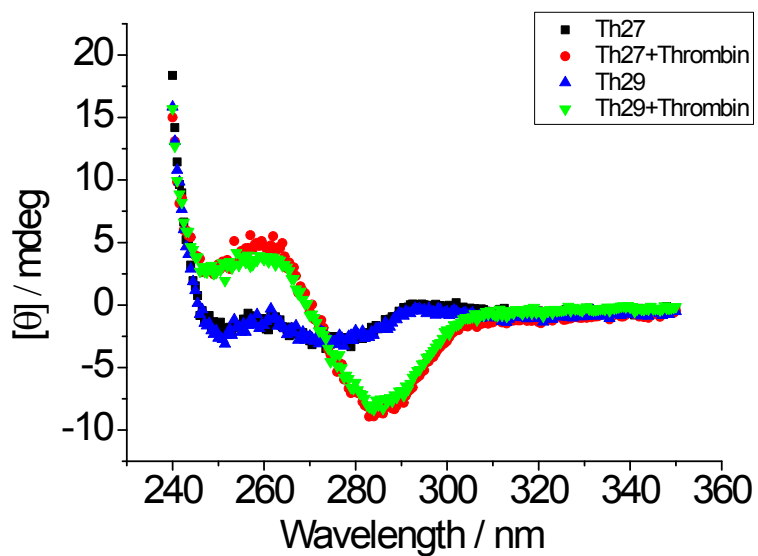

**Fig. S1** The circular dichroism spectra of 27-mer aptamer (Th27) and 29-mer aptamer (Th29) against thrombin in absence of thrombin and in presence of thrombin in the binding buffer solution containing 20 mM Tris-HCl, 10 mM NaCl, 0.5 mM MgCl<sub>2</sub>, 0.5 g/L BSA (pH 7.5). CD spectra measurements were conducted on a Jasco J-815 CD spectrometer (Tokyo, Japan). The cuvette with a path length of 1 cm was used. The concentration of used aptamers was 3  $\mu\text{M}$ , and the concentration of used thrombin was 3  $\mu\text{M}$ .

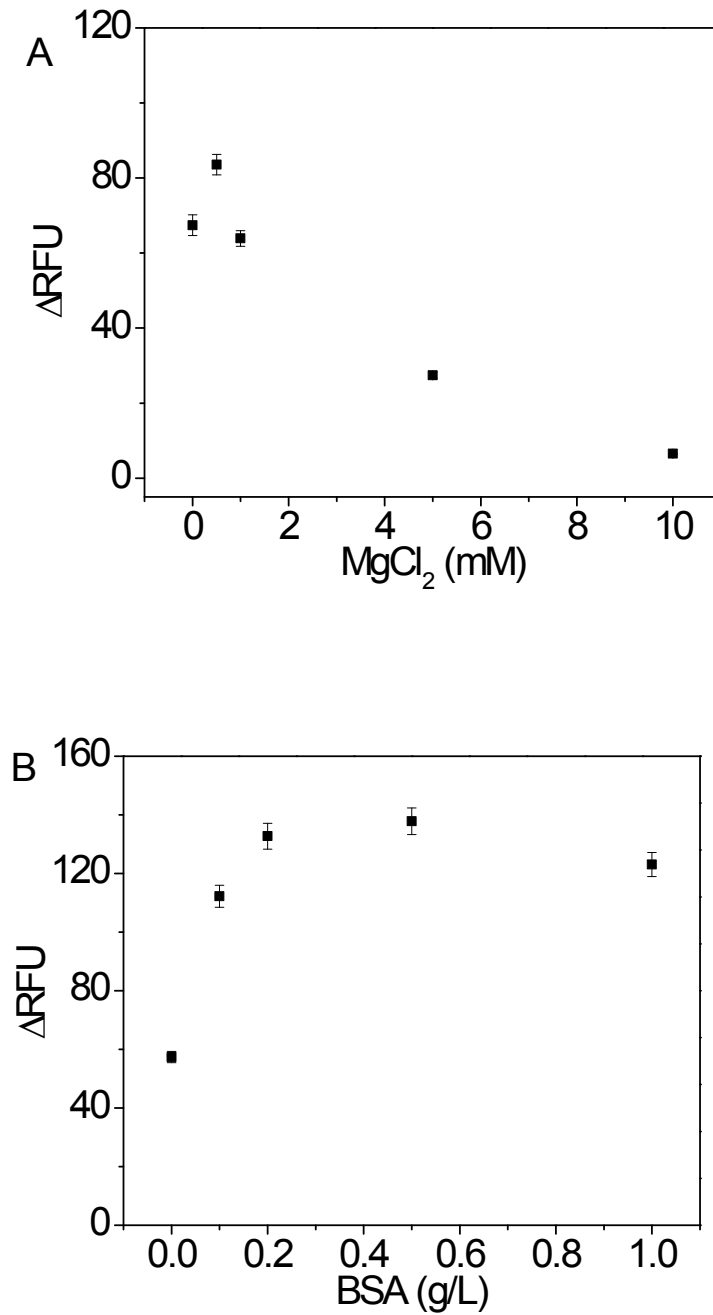

**Fig. S2** (A) Effect of  $Mg^{2+}$  concentration on fluorescence change of the aptamer caused by thrombin in the binding solution containing 20 mM Tris-HCl (pH 7.5), 2 nM aptamer probe, 8.3 nM thrombin and varying concentrations of  $MgCl_2$ . (B) Effect of BSA concentration on fluorescence change of the aptamer caused by thrombin in the binding solution containing 20 mM Tris-HCl (pH 7.5), 2 nM aptamer probe, 8.3 nM thrombin and varying concentrations of BSA.

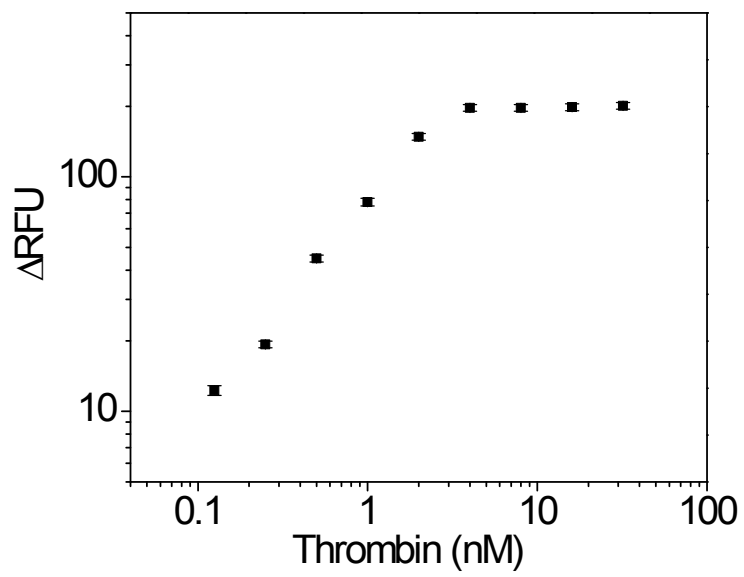

**Fig. S3** Detection of thrombin spiked in 250-fold diluted human serum.
